# Supplementary material for: In Vitro Modeling as a Tool for Testing Therapeutics for Spinal Muscular Atrophy and IGHMBP2-Related Disorders
Source: MDPI journal article supplement (doi:10.3390/biology12060867), 2023-06-16
Supplement: s1 [file s1]

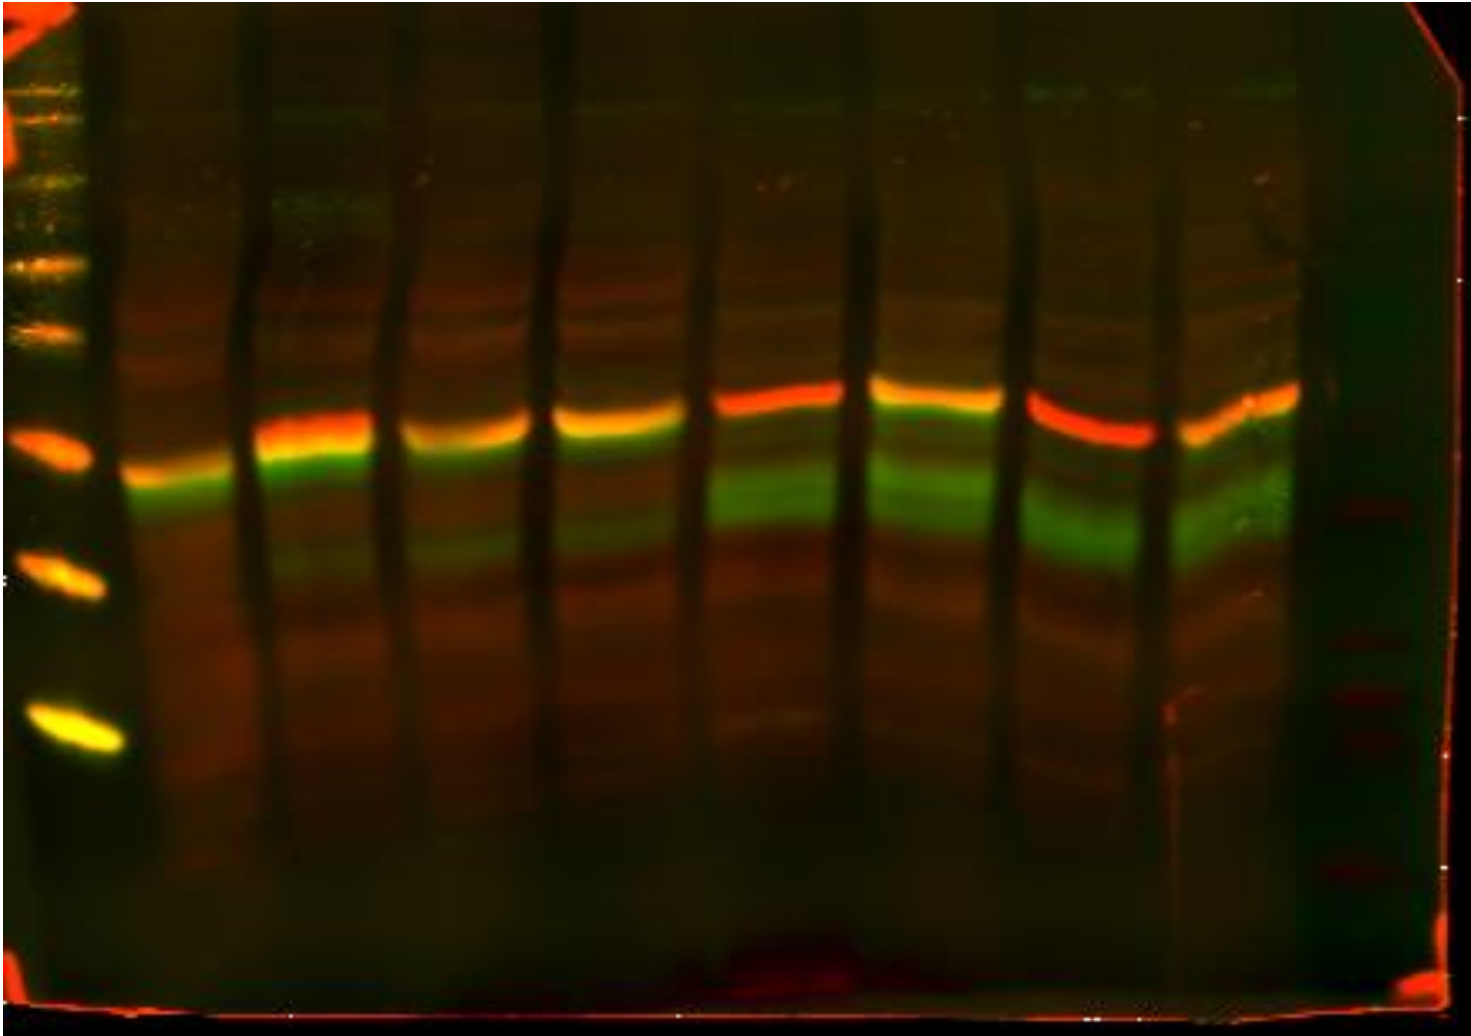

Lane 1: Control 1  
Lane 2: Control 1 +AAV9.SMN  
Lane 3: Control 2  
Lane 4: Control 2+ AAV9.SMN  
Lane 5: SMA patient 1  
Lane 6: SMA patient 1+ AAV9.SMN  
Lane7: SMA Patient 2  
Lane 8: SMA patient 2+AAV9.SMN

SMN: Green (SMN band at 38kDA)  
GAPDH: Red (Band at 37kDA)
